# Supplementary material for: Phase Angle Is a Stronger Predictor of Hospital Outcome than Subjective Global Assessment—Results from the Prospective Dessau Hospital Malnutrition Study
Source: MDPI journal article supplement (doi:10.3390/nu14091780), 2022-04-24
Supplement: s1 [file s1]

**Table S1.** Cox cause specific proportional hazards analysis.

| Variable                                   | N         | Model I               | Model II              | Model III             |
|--------------------------------------------|-----------|-----------------------|-----------------------|-----------------------|
|                                            |           | Estimate + 95% CI     | Estimate + 95% CI     | Estimate + 95% CI     |
| SGA — A                                    | 584 (39%) | 1.00                  | 1.00                  | 1.00                  |
| SGA — B/C                                  | 915 (61%) | 0.69 (0.62, 0.78) *** | 0.9 (0.77, 1.06)      | 0.94 (0.78, 1.13)     |
| Phase angle ≤3                             | 327 (22%) |                       | 0.43 (0.35, 0.52) *** | 0.56 (0.45, 0.7) ***  |
| Phase angle 3–4                            | 482 (32%) |                       | 0.61 (0.49, 0.77) *** | 0.77 (0.6, 0.99) #    |
| Phase angle 4–5                            | 424 (28%) |                       | 0.73 (0.63, 0.86) *** | 0.8 (0.68, 0.94) *    |
| Phase angle >5                             | 272 (18%) |                       | 1.00                  | 1.00                  |
| Age ≤65                                    | 375 (25%) | 0.93 (0.72, 1.2)      | 0.8 (0.63, 1.01)      | 0.81 (0.65, 1.02)     |
| Age 65–75                                  | 361 (24%) | 1.00                  | 1.00                  | 1.00                  |
| Age 75–80                                  | 337 (22%) | 1 (0.83, 1.2)         | 0.98 (0.83, 1.17)     | 0.97 (0.84, 1.12)     |
| Age >80                                    | 432 (29%) | 1.09 (0.93, 1.28)     | 1.16 (0.98, 1.36)     | 1.11 (0.95, 1.29)     |
| BMI ≤18.5                                  | 162 (11%) | 1.06 (0.86, 1.3)      | 1.13 (0.95, 1.35)     | 1.1 (0.89, 1.34)      |
| BMI 18.5–25                                | 715 (48%) | 1.00                  | 1.00                  | 1.00                  |
| BMI 25–30                                  | 379 (25%) | 0.95 (0.79, 1.14)     | 0.96 (0.79, 1.18)     | 1.01 (0.82, 1.24)     |
| BMI >30                                    | 241 (16%) | 0.74 (0.61, 0.89) *   | 0.76 (0.62, 0.95) #   | 0.82 (0.66, 1.02)     |
| CRP ≤10                                    | 480 (32%) |                       |                       | 1.00                  |
| CRP 10–100                                 | 673 (45%) |                       |                       | 0.73 (0.61, 0.86) **  |
| CRP >100                                   | 158 (10%) |                       |                       | 0.58 (0.47, 0.71) *** |
| CRP -no value                              | 194 (13%) |                       |                       | 1.97 (1.47, 2.66) *** |
| Sex — male                                 | 723 (48%) | 1.00                  | 1.00                  | 1.00                  |
| Sex — female                               | 782 (52%) | 1.02 (0.94, 1.11)     | 1.07 (0.99, 1.16)     | 0.97 (0.89, 1.07)     |
| ICD A–B: infections                        | 79 (5%)   | 0.87 (0.71, 1.07)     | 0.92 (0.74, 1.14)     | 0.92 (0.72, 1.16)     |
| ICD C–D50: neoplasms                       | 356 (24%) | 0.62 (0.46, 0.85) *   | 0.62 (0.45, 0.85) *   | 0.61 (0.45, 0.84) *   |
| ICD D50–89: blood and blood forming organs | 72 (5%)   | 1.16 (0.9, 1.51)      | 1.26 (0.97, 1.62)     | 1.15 (0.92, 1.44)     |
| ICD E: endocrine                           | 35 (2%)   | 1.36 (0.78, 2.39)     | 1.31 (0.69, 2.5)      | 1.18 (0.64, 2.17)     |
| ICD G: nervous system                      | 39 (3%)   | 1.05 (0.71, 1.55)     | 1.06 (0.71, 1.58)     | 0.8 (0.48, 1.33)      |
| ICD I: circulatory                         | 176 (12%) | 0.62 (0.49, 0.79) *** | 0.61 (0.47, 0.79) **  | 0.53 (0.4, 0.7) ***   |
| ICD J: respiratory                         | 110 (7%)  | 0.72 (0.52, 1.01)     | 0.71 (0.51, 0.98) #   | 0.69 (0.52, 0.92) #   |
| ICD I K: digestive                         | 286 (19%) | 1.00                  | 1.00                  | 1.00                  |
| ICD M: musculoskeletal                     | 60 (4%)   | 0.54 (0.38, 0.76) **  | 0.54 (0.38, 0.77) **  | 0.49 (0.35, 0.69) *** |
| ICD N: genitourinary                       | 62 (4%)   | 1.04 (0.68, 1.57)     | 1.1 (0.72, 1.67)      | 1.14 (0.88, 1.48)     |
| ICD other                                  | 37 (2%)   | 0.9 (0.62, 1.31)      | 0.87 (0.59, 1.27)     | 0.78 (0.53, 1.15)     |
| ICD R: abnormal findings                   | 65 (4%)   | 1.36 (0.89, 2.08)     | 1.32 (0.84, 2.08)     | 1.21 (0.8, 1.83)      |
| ICD S–T: injury, poison                    | 103 (7%)  | 0.47 (0.37, 0.59) *** | 0.48 (0.38, 0.59) *** | 0.49 (0.41, 0.58) *** |
| <b>CONCORDANCE</b>                         |           | <b>0.616</b>          | <b>0.639</b>          | <b>0.672</b>          |

Model I: Age, sex, BMI, ICD-10 disease category and SGA. Model II: PhA added to model I. Model III: CRP added to model II. All data are hazard ratios (HR) and 95% confidence intervals (in parentheses). #  $p < 0.05$ , \*  $p < 0.01$ , \*\*  $p < 0.001$ , \*\*\*  $p < 0.0001$ . BMI, body mass index; ICD-10, 10th revision of the International Statistical Classification of Diseases and Related Health Problems; ICD A–T, disease classification; SGA, Subjective Global Assessment; SGA A, B and C, types of nutrition assessment; PhA, Phase Angle; CRP, C-reactive protein; CI, confidence interval.

**Table S2.** Main Fine and Gray analysis excluding readmissions.

| Variable                                   | N         | Model I               | Model II              | Model III             |
|--------------------------------------------|-----------|-----------------------|-----------------------|-----------------------|
|                                            |           | Estimate + 95%CI      | Estimate + 95%CI      | Estimate + 95%CI      |
| SGA—A                                      | 522 (42%) | 1.00                  | 1.00                  | 1.00                  |
| SGA—B/C                                    | 733 (58%) | 0.72 (0.67, 0.77) *** | 0.91 (0.81, 1.03)     | 0.94 (0.82, 1.09)     |
| Phase angle ≤3                             | 254 (20%) |                       | 0.46 (0.37, 0.59) *** | 0.59 (0.44, 0.78) **  |
| Phase angle 3–4                            | 398 (32%) |                       | 0.68 (0.57, 0.82) *** | 0.84 (0.68, 1.03)     |
| Phase angle 4–5                            | 358 (28%) |                       | 0.8 (0.68, 0.93) **   | 0.85 (0.72, 1) #      |
| Phase angle >5                             | 251 (20%) |                       | 1.00                  | 1.00                  |
| Age ≤65                                    | 318 (25%) | 0.84 (0.67, 1.06)     | 0.73 (0.6, 0.89) *    | 0.74 (0.61, 0.9) *    |
| Age 65–75                                  | 286 (23%) | 1.00                  | 1.00                  | 1.00                  |
| Age 75–80                                  | 280 (22%) | 0.87 (0.7, 1.07)      | 0.84 (0.68, 1.04)     | 0.84 (0.68, 1.03)     |
| Age >80                                    | 377 (30%) | 0.93 (0.81, 1.07)     | 0.98 (0.84, 1.14)     | 0.93 (0.79, 1.09)     |
| BMI ≤18.5                                  | 125 (10%) | 1 (0.89, 1.12)        | 1.02 (0.89, 1.16)     | 0.94 (0.79, 1.11)     |
| BMI 18.5–25                                | 584 (47%) | 1.00                  | 1.00                  | 1.00                  |
| BMI 25–30                                  | 332 (26%) | 1 (0.86, 1.15)        | 1 (0.86, 1.17)        | 1.06 (0.91, 1.24)     |
| BMI >30                                    | 213 (17%) | 0.84 (0.73, 0.96)#    | 0.86 (0.73, 1.01)     | 0.9 (0.79, 1.03)      |
| CRP ≤10                                    | 411 (33%) |                       |                       | 1.00                  |
| CRP 10–100                                 | 547 (43%) |                       |                       | 0.74 (0.6, 0.9) *     |
| CRP >100                                   | 132 (10%) |                       |                       | 0.55 (0.43, 0.7) ***  |
| CRP—no value                               | 171 (14%) |                       |                       | 1.7 (1.23, 2.35) *    |
| Sex—male                                   | 598 (47%) | 1.00                  | 1.00                  | 1.00                  |
| Sex—female                                 | 663 (53%) | 1.04 (0.97, 1.12)     | 1.08 (1, 1.17) #      | 0.96 (0.86, 1.08)     |
| ICD A–B: infections                        | 65 (5%)   | 0.84 (0.69, 1.02)     | 0.88 (0.73, 1.05)     | 0.87 (0.69, 1.1)      |
| ICD C–D50: neoplasms                       | 271 (22%) | 0.61 (0.46, 0.79) **  | 0.6 (0.46, 0.8) **    | 0.58 (0.44, 0.76) *** |
| ICD D50–89: blood and blood forming organs | 62 (5%)   | 1.09 (0.78, 1.54)     | 1.11 (0.78, 1.57)     | 0.96 (0.64, 1.43)     |
| ICD E: endocrine                           | 33 (3%)   | 1.51 (0.83, 2.74)     | 1.41 (0.7, 2.84)      | 1.29 (0.67, 2.51)     |
| ICD G: nervous system                      | 36 (3%)   | 1.14 (0.85, 1.54)     | 1.12 (0.81, 1.55)     | 0.85 (0.54, 1.35)     |
| ICD I: circulatory                         | 156 (12%) | 0.58 (0.48, 0.71) *** | 0.57 (0.46, 0.71) *** | 0.51 (0.39, 0.66) *** |
| ICD J: respiratory                         | 89 (7%)   | 0.61 (0.48, 0.78) *** | 0.61 (0.48, 0.78) *** | 0.61 (0.5, 0.75) ***  |
| ICD 1 K: digestive                         | 244 (20%) | 1.00                  | 1.00                  | 1.00                  |
| ICD M: musculoskeletal                     | 55 (4%)   | 0.66 (0.48, 0.91) #   | 0.65 (0.47, 0.91) #   | 0.63 (0.45, 0.88) *   |
| ICD N: genitourinary                       | 58 (5%)   | 1 (0.72, 1.39)        | 1.03 (0.73, 1.46)     | 1.1 (0.88, 1.38)      |
| ICD other                                  | 31 (2%)   | 0.65 (0.38, 1.09)     | 0.57 (0.32, 0.99) #   | 0.49 (0.27, 0.87) #   |
| ICD R: abnormal findings                   | 58 (5%)   | 1.25 (0.74, 2.11)     | 1.23 (0.7, 2.18)      | 1.03 (0.59, 1.81)     |
| ICD S–T: injury, poison                    | 91 (7%)   | 0.54 (0.44, 0.65) *** | 0.56 (0.47, 0.66) *** | 0.57 (0.49, 0.67) *** |
| <b>CONCORDANCE</b>                         |           | <b>0.614</b>          | <b>0.636</b>          | <b>0.666</b>          |

Model I: Age, sex, BMI, ICD-10 disease category and SGA. Model II: PhA added to model I. Model III: CRP added to model II. All data are hazard ratios (HR) and 95% confidence intervals (in parentheses). #  $p < 0.05$ , \*  $p < 0.01$ , \*\*  $p < 0.001$ , \*\*\*  $p < 0.0001$ .

**Table S3.** Fine and Gray analysis including Pandora variables and weightloss.

|                                            |              | Model I               | Model II              | Model III             |
|--------------------------------------------|--------------|-----------------------|-----------------------|-----------------------|
|                                            | <i>n</i> (%) | Estimate + 95% CI     | Estimate + 95% CI     | Estimate + 95% CI     |
| SGA — A                                    | 584 (39%)    | 1.00                  | 1.00                  | 1.00                  |
| SGA — B/C                                  | 915 (61%)    | 0.85 (0.78, 0.92) *** | 0.99 (0.89, 1.09)     | 1.03 (0.91, 1.15)     |
| Phase angle ≤3                             | 327 (22%)    |                       | 0.59 (0.47, 0.74) *** | 0.72 (0.57, 0.91) *   |
| Phase angle 3–4                            | 482 (32%)    |                       | 0.73 (0.62, 0.87) **  | 0.88 (0.74, 1.05)     |
| Phase angle 4–5                            | 424 (28%)    |                       | 0.87 (0.77, 0.99) #   | 0.9 (0.79, 1.02)      |
| Phase angle >5                             | 272 (18%)    |                       | 1.00                  | 1.00                  |
| Age ≤65                                    | 375 (25%)    | 0.86 (0.71, 1.05)     | 0.79 (0.66, 0.95) #   | 0.79 (0.66, 0.94) *   |
| Age 65–75                                  | 361 (24%)    | 1.00                  | 1.00                  | 1.00                  |
| Age 75–80                                  | 337 (22%)    | 0.91 (0.76, 1.09)     | 0.91 (0.76, 1.08)     | 0.92 (0.78, 1.08)     |
| Age >80                                    | 432 (29%)    | 1.01 (0.87, 1.16)     | 1.05 (0.91, 1.21)     | 0.99 (0.87, 1.14)     |
| BMI ≤18.5                                  | 162 (11%)    | 0.99 (0.83, 1.17)     | 1.03 (0.89, 1.21)     | 0.99 (0.81, 1.2)      |
| BMI 18.5–25                                | 715 (48%)    | 1.00                  | 1.00                  | 1.00                  |
| BMI 25–30                                  | 379 (25%)    | 1.09 (0.93, 1.28)     | 1.06 (0.9, 1.25)      | 1.11 (0.94, 1.33)     |
| BMI >30                                    | 241 (16%)    | 0.99 (0.9, 1.09)      | 0.94 (0.85, 1.04)     | 1.01 (0.89, 1.15)     |
| Can you walk? Yes                          | 859 (57%)    | 1.00                  | 1.00                  | 1.00                  |
| Can you walk? With assistance              | 432 (29%)    | 0.79 (0.64, 0.99)     | 0.84 (0.67, 1.05)     | 0.85 (0.67, 1.08)     |
| Can you walk? Stay in bed                  | 203 (14%)    | 0.59 (0.48, 0.73) *** | 0.66 (0.52, 0.83) **  | 0.68 (0.55, 0.86) **  |
| CRP ≤10                                    | 480 (32%)    |                       |                       | 1.00                  |
| CRP 10–100                                 | 673 (45%)    |                       |                       | 0.74 (0.63, 0.88) **  |
| CRP >100                                   | 158 (10%)    |                       |                       | 0.54 (0.42, 0.7) ***  |
| CRP—missing                                | 194 (13%)    |                       |                       | 1.74 (1.27, 2.39) **  |
| Eaten today — all                          | 933 (62%)    | 1.00                  | 1.00                  | 1.00                  |
| Eaten today — half                         | 262 (18%)    | 0.75 (0.64, 0.89) **  | 0.77 (0.66, 0.91) *   | 0.83 (0.72, 0.97) #   |
| Eaten today — quarter                      | 49 (3%)      | 0.7 (0.51, 0.96) #    | 0.74 (0.52, 1.05)     | 0.84 (0.61, 1.17)     |
| Eaten today — nothing, allowed             | 28 (2%)      | 0.85 (0.52, 1.4)      | 0.85 (0.53, 1.36)     | 0.87 (0.52, 1.45)     |
| Eaten today — nothing, not allowed         | 223 (15%)    | 1.22 (1.04, 1.44) #   | 1.19 (1.01, 1.39) #   | 1.27 (1.07, 1.51) *   |
| Fluid status—normal                        | 826 (55%)    | 1.00                  | 1.00                  | 1.00                  |
| Fluid status—overloaded                    | 374 (25%)    | 0.94 (0.89, 1) #      | 1.03 (0.95, 1.1)      | 1.03 (0.94, 1.13)     |
| Fluid status—dry                           | 295 (20%)    | 1.08 (0.91, 1.28)     | 1.02 (0.87, 1.19)     | 1 (0.88, 1.13)        |
| Sex — male                                 | 723 (48%)    | 1.00                  | 1.00                  | 1.00                  |
| Sex — female                               | 782 (52%)    | 1.08 (0.96, 1.2)      | 1.1 (0.99, 1.22)      | 1 (0.9, 1.11)         |
| ICD A–B: infections                        | 79 (5%)      | 0.96 (0.81, 1.14)     | 0.96 (0.82, 1.13)     | 0.97 (0.81, 1.17)     |
| ICD C–D50: neoplasms                       | 356 (24%)    | 0.63 (0.48, 0.82) **  | 0.62 (0.47, 0.82) **  | 0.61 (0.47, 0.79) **  |
| ICD D50–89: blood and blood forming organs | 72 (5%)      | 1.16 (0.83, 1.63)     | 1.18 (0.83, 1.66)     | 1.08 (0.79, 1.47)     |
| ICD E: endocrine                           | 35 (2%)      | 1.45 (0.83, 2.55)     | 1.39 (0.76, 2.52)     | 1.28 (0.73, 2.24)     |
| ICD G: nervous system                      | 39 (3%)      | 1.35 (0.97, 1.89)     | 1.27 (0.93, 1.74)     | 0.97 (0.65, 1.46)     |
| ICD I: circulatory                         | 176 (12%)    | 0.66 (0.57, 0.77) *** | 0.64 (0.53, 0.76) *** | 0.57 (0.46, 0.71) *** |
| ICD J: respiratory                         | 110 (7%)     | 0.68 (0.53, 0.87) *   | 0.65 (0.5, 0.85) *    | 0.64 (0.51, 0.8) ***  |
| ICD K: digestive                           | 286 (19%)    | 1.00                  | 1.00                  | 1.00                  |
| ICD M: musculoskeletal                     | 60 (4%)      | 0.72 (0.49, 1.08)     | 0.68 (0.46, 1.02)     | 0.63 (0.42, 0.94) #   |
| ICD N: genitourinary                       | 62 (4%)      | 0.95 (0.65, 1.4)      | 0.97 (0.65, 1.44)     | 1.03 (0.78, 1.35)     |
| ICD other                                  | 37 (2%)      | 0.71 (0.42, 1.19)     | 0.64 (0.38, 1.09)     | 0.56 (0.31, 1)        |
| ICD R: abnormal findings                   | 65 (4%)      | 1.15 (0.67, 1.98)     | 1.09 (0.63, 1.88)     | 0.96 (0.56, 1.65)     |
| ICD S–T: injury, poison                    | 103 (7%)     | 0.62 (0.52, 0.76) *** | 0.61 (0.5, 0.74) ***  | 0.63 (0.53, 0.74) *** |
| Weight loss <0%                            | 208 (14%)    | 0.9 (0.77, 1.04)      | 0.92 (0.79, 1.07)     | 0.86 (0.74, 1) #      |
| Weight loss 0%                             | 259 (18%)    | 1.15 (1, 1.33)        | 1.16 (1.01, 1.34) #   | 1.14 (0.99, 1.32)     |
| Weight loss 0–5%                           | 312 (22%)    | 1.00                  | 1.00                  | 1.00                  |
| Weight loss 5–10%                          | 309 (21%)    | 1.04 (0.9, 1.2)       | 1.05 (0.91, 1.21)     | 1.03 (0.89, 1.2)      |

|                    |           |                |                   |                   |
|--------------------|-----------|----------------|-------------------|-------------------|
| Weight loss >10%   | 352 (24%) | 1 (0.88, 1.13) | 1.04 (0.92, 1.16) | 1.07 (0.95, 1.21) |
| <b>CONCORDANCE</b> |           | <b>0.631</b>   | <b>0.639</b>      | <b>0.666</b>      |

Model I: Age, sex, BMI, can you walk, eaten today, fluid status, ICD-10 disease category, SGA and weight loss. Model II: PhA added to model I. Model III: CRP added to model II. All data are hazard ratios (HR) and 95% confidence intervals (in parentheses). #  $p < 0.05$ , \*  $p < 0.01$ , \*\*  $p < 0.001$ , \*\*\*  $p < 0.0001$ .
